# Supplementary material for: Effect of Polyphenol Supplementation on Memory Functioning in Overweight and Obese Adults: A Systematic Review and Meta-Analysis
Source: MDPI journal article supplement (doi:10.3390/nu16040474), 2024-02-06
Supplement: s1 [file s1]

**Table S2.** Sensitivity analysis of the studies (RCTs and Cross-over design) included for delayed recall meta-analysis

| RCT                          | Model statistics with this study omitted |          |          |
|------------------------------|------------------------------------------|----------|----------|
| Study omitted                | <i>Hedges g</i>                          | <i>z</i> | <i>p</i> |
| Anton et al 2018             | 0.044                                    | 0.913    | 0.360    |
| Botwell et al 2017           | 0.042                                    | 0.872    | 0.382    |
| Henderson et al 2012         | 0.051                                    | 0.965    | 0.334    |
| Huhn et al 2016              | 0.045                                    | 0.933    | 0.350    |
| Kreijkamp-Kaspers et al 2004 | 0.024                                    | 0.466    | 0.641    |
| Kobe et al 2017              | 0.043                                    | 0.894    | 0.371    |
| Rayney-Smith et al 2015      | 0.031                                    | 0.621    | 0.534    |
| Sala-Vila et al 2020         | 0.077                                    | 1.261    | 0.207    |
| Siddarth et al 2020          | 0.035                                    | 0.682    | 0.494    |
| Witte et al 2014             | 0.032                                    | 0.652    | 0.514    |
| Evans et al. 2017            | 0.031                                    | 0.638    | 0.523    |
| Krikorian et al. 2022        | 0.049                                    | 1.003    | 0.315    |
| Cross-over                   | Model statistics with this study omitted |          |          |
| Alharbi et al. 2016          | -0.114                                   | -0.789   | 0.430    |
| Kennedy et al 2017           | -0.116                                   | -0.817   | 0.413    |
| Dodd et al 2019              | -0.153                                   | -0.950   | 0.341    |
| Whyte et al. 2021            | -0.070                                   | -0.445   | 0.655    |
