# Supplementary material for: Effect of Polyphenol Supplementation on Memory Functioning in Overweight and Obese Adults: A Systematic Review and Meta-Analysis
Source: MDPI journal article supplement (doi:10.3390/nu16040474), 2024-02-06
Supplement: s1 [file s1]

|    | Study name | Comparison |
|----|------------|------------|
| 1  |            |            |
| 2  |            |            |
| 3  |            |            |
| 4  |            |            |
| 5  |            |            |
| 6  |            |            |
| 7  |            |            |
| 8  |            |            |
| 9  |            |            |
| 10 |            |            |
| 11 |            |            |
| 12 |            |            |
| 13 |            |            |
| 14 |            |            |
| 15 |            |            |
| 16 |            |            |
| 17 |            |            |
| 18 |            |            |
| 19 |            |            |
| 20 |            |            |
| 21 |            |            |
| 22 |            |            |
| 23 |            |            |
| 24 |            |            |
| 25 |            |            |
| 26 |            |            |
| 27 |            |            |
| 28 |            |            |
| 29 |            |            |
| 30 |            |            |
| 31 |            |            |
| 32 |            |            |
| 33 |            |            |
| 34 |            |            |
| 35 |            |            |
| 36 |            |            |
| 37 |            |            |
| 38 |            |            |
| 39 |            |            |

|    | Data format | Intervention Mean | Intervention Std-Dev | Intervention Sample size | Control Mean | Control Std-Dev | Control Sample size | Effect direction | Std diff in means | Std Err |
|----|-------------|-------------------|----------------------|--------------------------|--------------|-----------------|---------------------|------------------|-------------------|---------|
| 1  |             |                   |                      |                          |              |                 |                     |                  | -0.244            | 0.303   |
| 2  |             |                   |                      |                          |              |                 |                     |                  | 0.027             | 0.302   |
| 3  |             |                   |                      |                          |              |                 |                     |                  | -0.739            | 0.442   |
| 4  |             |                   |                      |                          |              |                 |                     |                  | -0.600            | 0.457   |
| 5  |             |                   |                      |                          |              |                 |                     |                  | -0.040            | 0.447   |
| 6  |             |                   |                      |                          |              |                 |                     |                  | 0.522             | 0.435   |
| 7  |             |                   |                      |                          |              |                 |                     |                  | -0.415            | 0.398   |
| 8  |             |                   |                      |                          |              |                 |                     |                  | -0.113            | 0.394   |
| 9  |             |                   |                      |                          |              |                 |                     |                  | 0.416             | 0.398   |
| 10 |             |                   |                      |                          |              |                 |                     |                  | -0.189            | 0.334   |
| 11 |             |                   |                      |                          |              |                 |                     |                  | -0.144            | 0.334   |
| 12 |             |                   |                      |                          |              |                 |                     |                  | 0.253             | 0.335   |
| 13 |             |                   |                      |                          |              |                 |                     |                  | -0.313            | 0.335   |
| 14 |             |                   |                      |                          |              |                 |                     |                  | 0.034             | 0.115   |
| 15 |             |                   |                      |                          |              |                 |                     |                  | 0.113             | 0.114   |
| 16 |             |                   |                      |                          |              |                 |                     |                  | -0.163            | 0.113   |
| 17 |             |                   |                      |                          |              |                 |                     |                  | -0.219            | 0.276   |
| 18 |             |                   |                      |                          |              |                 |                     |                  | -0.255            | 0.276   |
| 19 |             |                   |                      |                          |              |                 |                     |                  | 0.173             | 0.275   |
| 20 |             |                   |                      |                          |              |                 |                     |                  | 0.197             | 0.162   |
| 21 |             |                   |                      |                          |              |                 |                     |                  | -0.056            | 0.218   |
| 22 |             |                   |                      |                          |              |                 |                     |                  | -0.256            | 0.219   |
| 23 |             |                   |                      |                          |              |                 |                     |                  | -0.045            | 0.218   |
| 24 |             |                   |                      |                          |              |                 |                     |                  | 0.032             | 0.218   |
| 25 |             |                   |                      |                          |              |                 |                     |                  | -0.029            | 0.218   |
| 26 |             |                   |                      |                          |              |                 |                     |                  | -0.004            | 0.218   |
| 27 |             |                   |                      |                          |              |                 |                     |                  | -0.217            | 0.219   |
| 28 |             |                   |                      |                          |              |                 |                     |                  | 0.024             | 0.218   |
| 29 |             |                   |                      |                          |              |                 |                     |                  | 0.061             | 0.218   |
| 30 |             |                   |                      |                          |              |                 |                     |                  | 0.436             | 0.221   |
| 31 |             |                   |                      |                          |              |                 |                     |                  | -0.301            | 0.219   |
| 32 |             |                   |                      |                          |              |                 |                     |                  | 0.316             | 0.220   |
| 33 |             |                   |                      |                          |              |                 |                     |                  | 0.008             | 0.218   |
| 34 |             |                   |                      |                          |              |                 |                     |                  | 0.139             | 0.218   |
| 35 |             |                   |                      |                          |              |                 |                     |                  | -0.106            | 0.218   |
| 36 |             |                   |                      |                          |              |                 |                     |                  | 0.074             | 0.218   |
| 37 |             |                   |                      |                          |              |                 |                     |                  | -0.178            | 0.227   |
| 38 |             |                   |                      |                          |              |                 |                     |                  | 0.097             | 0.227   |
| 39 |             |                   |                      |                          |              |                 |                     |                  | -0.271            | 0.227   |

|    | Hedges's g | Std Err | Difference in means | Std Err | Duration of diet | R |
|----|------------|---------|---------------------|---------|------------------|---|
| 1  | -0.239     | 0.297   | -0.800              | 0.990   |                  |   |
| 2  | 0.026      | 0.296   | 0.100               | 1.131   |                  |   |
| 3  | -0.711     | 0.426   | -1.670              | 0.967   |                  |   |
| 4  | -0.575     | 0.438   | -1.500              | 1.118   |                  |   |
| 5  | -0.038     | 0.428   | -0.300              | 3.369   |                  |   |
| 6  | 0.502      | 0.419   | 6.230               | 5.110   |                  |   |
| 7  | -0.402     | 0.385   | -0.900              | 0.854   |                  |   |
| 8  | -0.110     | 0.381   | -0.030              | 0.104   |                  |   |
| 9  | 0.403      | 0.385   | 1.500               | 1.419   |                  |   |
| 10 | -0.185     | 0.327   | -0.450              | 0.792   |                  |   |
| 11 | -0.141     | 0.326   | -0.410              | 0.948   |                  |   |
| 12 | 0.247      | 0.327   | 0.940               | 1.238   |                  |   |
| 13 | -0.306     | 0.328   | -1.380              | 1.471   |                  |   |
| 14 | 0.033      | 0.114   |                     |         |                  |   |
| 15 | 0.113      | 0.113   |                     |         |                  |   |
| 16 | -0.163     | 0.113   |                     |         |                  |   |
| 17 | -0.216     | 0.272   | -0.670              | 0.840   |                  |   |
| 18 | -0.252     | 0.272   | -0.680              | 0.732   |                  |   |
| 19 | 0.171      | 0.271   | 2.875               | 4.561   |                  |   |
| 20 | 0.196      | 0.151   | 0.600               | 0.461   |                  |   |
| 21 | -0.055     | 0.216   | -0.880              | 3.451   |                  |   |
| 22 | -0.254     | 0.217   | -4.230              | 3.601   |                  |   |
| 23 | -0.044     | 0.216   | -0.770              | 3.755   |                  |   |
| 24 | 0.032      | 0.216   | 0.570               | 3.897   |                  |   |
| 25 | -0.029     | 0.216   | -0.480              | 3.557   |                  |   |
| 26 | -0.004     | 0.216   | -0.070              | 3.476   |                  |   |
| 27 | -0.215     | 0.217   | -3.350              | 3.369   |                  |   |
| 28 | 0.024      | 0.216   | 0.370               | 3.319   |                  |   |
| 29 | 0.060      | 0.216   | 0.910               | 3.275   |                  |   |
| 30 | 0.432      | 0.219   | 6.480               | 3.245   |                  |   |
| 31 | -0.298     | 0.217   | -4.340              | 3.148   |                  |   |
| 32 | 0.313      | 0.218   | 4.730               | 3.267   |                  |   |
| 33 | 0.008      | 0.216   | 0.120               | 3.247   |                  |   |
| 34 | 0.138      | 0.216   | 2.110               | 3.309   |                  |   |
| 35 | -0.105     | 0.216   | -1.550              | 3.199   |                  |   |
| 36 | 0.073      | 0.216   | 1.160               | 3.424   |                  |   |
| 37 | -0.176     | 0.225   | -1.090              | 1.387   |                  |   |
| 38 | 0.096      | 0.224   | 0.590               | 1.372   |                  |   |
| 39 | -0.268     | 0.225   | -1.760              | 1.471   |                  |   |

|    | Study name | Comparison |
|----|------------|------------|
| 40 |            |            |
| 41 |            |            |
| 42 |            |            |
| 43 |            |            |
| 44 |            |            |
| 45 |            |            |
| 46 |            |            |
| 47 |            |            |
| 48 |            |            |
| 49 |            |            |
| 50 |            |            |
| 51 |            |            |
| 52 |            |            |
| 53 |            |            |
| 54 |            |            |
| 55 |            |            |
| 56 |            |            |
| 57 |            |            |
| 58 |            |            |
| 59 |            |            |
| 60 |            |            |
| 61 |            |            |
| 62 |            |            |
| 63 |            |            |
| 64 |            |            |
| 65 |            |            |
| 66 |            |            |
| 67 |            |            |
| 68 |            |            |
| 69 |            |            |
| 70 |            |            |
| 71 |            |            |
| 72 |            |            |
| 73 |            |            |
| 74 |            |            |
| 75 |            |            |
| 76 |            |            |
| 77 |            |            |
| 78 |            |            |

|    | Data format | Intervention Mean | Intervention Std-Dev | Intervention Sample size | Control Mean | Control Std-Dev | Control Sample size | Effect direction | Std diff in means | Std Err |
|----|-------------|-------------------|----------------------|--------------------------|--------------|-----------------|---------------------|------------------|-------------------|---------|
| 40 |             |                   |                      |                          |              |                 |                     |                  | -0.219            | 0.227   |
| 41 |             |                   |                      |                          |              |                 |                     |                  | -0.096            | 0.227   |
| 42 |             |                   |                      |                          |              |                 |                     |                  | 0.387             | 0.229   |
| 43 |             |                   |                      |                          |              |                 |                     |                  | -0.036            | 0.226   |
| 44 |             |                   |                      |                          |              |                 |                     |                  | 0.145             | 0.227   |
| 45 |             |                   |                      |                          |              |                 |                     |                  | -0.116            | 0.227   |
| 46 |             |                   |                      |                          |              |                 |                     |                  | 0.284             | 0.228   |
| 47 |             |                   |                      |                          |              |                 |                     |                  | -0.006            | 0.226   |
| 48 |             |                   |                      |                          |              |                 |                     |                  | -0.120            | 0.227   |
| 49 |             |                   |                      |                          |              |                 |                     |                  | -0.068            | 0.227   |
| 50 |             |                   |                      |                          |              |                 |                     |                  | -0.086            | 0.227   |
| 51 |             |                   |                      |                          |              |                 |                     |                  | -0.135            | 0.227   |
| 52 |             |                   |                      |                          |              |                 |                     |                  | -0.118            | 0.227   |
| 53 |             |                   |                      |                          |              |                 |                     |                  | -0.170            | 0.230   |
| 54 |             |                   |                      |                          |              |                 |                     |                  | -0.233            | 0.230   |
| 55 |             |                   |                      |                          |              |                 |                     |                  | 0.190             | 0.230   |
| 56 |             |                   |                      |                          |              |                 |                     |                  | -0.245            | 0.230   |
| 57 |             |                   |                      |                          |              |                 |                     |                  | -0.133            | 0.230   |
| 58 |             |                   |                      |                          |              |                 |                     |                  | -0.142            | 0.230   |
| 59 |             |                   |                      |                          |              |                 |                     |                  | 0.020             | 0.229   |
| 60 |             |                   |                      |                          |              |                 |                     |                  | -0.053            | 0.229   |
| 61 |             |                   |                      |                          |              |                 |                     |                  | -0.099            | 0.230   |
| 62 |             |                   |                      |                          |              |                 |                     |                  | -0.133            | 0.230   |
| 63 |             |                   |                      |                          |              |                 |                     |                  | 0.069             | 0.229   |
| 64 |             |                   |                      |                          |              |                 |                     |                  | -0.076            | 0.229   |
| 65 |             |                   |                      |                          |              |                 |                     |                  | -0.063            | 0.229   |
| 66 |             |                   |                      |                          |              |                 |                     |                  | -0.457            | 0.232   |
| 67 |             |                   |                      |                          |              |                 |                     |                  | -0.286            | 0.231   |
| 68 |             |                   |                      |                          |              |                 |                     |                  | -0.295            | 0.231   |
| 69 |             |                   |                      |                          |              |                 |                     |                  | -0.148            | 0.224   |
| 70 |             |                   |                      |                          |              |                 |                     |                  | 0.189             | 0.224   |
| 71 |             |                   |                      |                          |              |                 |                     |                  | -0.141            | 0.224   |
| 72 |             |                   |                      |                          |              |                 |                     |                  | -0.313            | 0.225   |
| 73 |             |                   |                      |                          |              |                 |                     |                  | 0.029             | 0.224   |
| 74 |             |                   |                      |                          |              |                 |                     |                  | 0.047             | 0.224   |
| 75 |             |                   |                      |                          |              |                 |                     |                  | -0.164            | 0.224   |
| 76 |             |                   |                      |                          |              |                 |                     |                  | 0.078             | 0.224   |
| 77 |             |                   |                      |                          |              |                 |                     |                  | 0.299             | 0.225   |
| 78 |             |                   |                      |                          |              |                 |                     |                  | 0.064             | 0.224   |

|    | Hedges's g | Std Err | Difference in means | Std Err | Duration of diet | R |
|----|------------|---------|---------------------|---------|------------------|---|
| 40 | -0.217     | 0.225   | -1.510              | 1.560   |                  |   |
| 41 | -0.095     | 0.224   | -0.640              | 1.503   |                  |   |
| 42 | 0.383      | 0.226   | 2.260               | 1.322   |                  |   |
| 43 | -0.035     | 0.224   | -0.230              | 1.456   |                  |   |
| 44 | 0.144      | 0.225   | 1.090               | 1.697   |                  |   |
| 45 | -0.115     | 0.224   | -0.770              | 1.500   |                  |   |
| 46 | 0.282      | 0.225   | 1.950               | 1.552   |                  |   |
| 47 | -0.006     | 0.224   | -0.040              | 1.408   |                  |   |
| 48 | -0.119     | 0.224   | -0.840              | 1.588   |                  |   |
| 49 | -0.068     | 0.224   | -0.430              | 1.423   |                  |   |
| 50 | -0.085     | 0.224   | -0.610              | 1.611   |                  |   |
| 51 | -0.134     | 0.224   | -0.870              | 1.454   |                  |   |
| 52 | -0.117     | 0.224   | -0.810              | 1.550   |                  |   |
| 53 | -0.168     | 0.227   | -1.850              | 2.499   |                  |   |
| 54 | -0.231     | 0.228   | -2.780              | 2.732   |                  |   |
| 55 | 0.188      | 0.228   | 2.090               | 2.530   |                  |   |
| 56 | -0.243     | 0.228   | -3.090              | 2.892   |                  |   |
| 57 | -0.132     | 0.227   | -1.680              | 2.901   |                  |   |
| 58 | -0.140     | 0.227   | -1.640              | 2.651   |                  |   |
| 59 | 0.020      | 0.227   | 0.240               | 2.743   |                  |   |
| 60 | -0.052     | 0.227   | -0.630              | 2.752   |                  |   |
| 61 | -0.098     | 0.227   | -1.150              | 2.671   |                  |   |
| 62 | -0.132     | 0.227   | -1.460              | 2.511   |                  |   |
| 63 | 0.068      | 0.227   | 0.770               | 2.568   |                  |   |
| 64 | -0.076     | 0.227   | -0.890              | 2.674   |                  |   |
| 65 | -0.063     | 0.227   | -0.700              | 2.538   |                  |   |
| 66 | -0.452     | 0.230   | -5.140              | 2.581   |                  |   |
| 67 | -0.283     | 0.228   | -2.820              | 2.264   |                  |   |
| 68 | -0.292     | 0.228   | -3.170              | 2.467   |                  |   |
| 69 | -0.147     | 0.222   | -1.270              | 1.914   |                  |   |
| 70 | 0.187      | 0.222   | 1.670               | 1.973   |                  |   |
| 71 | -0.140     | 0.222   | -1.260              | 1.995   |                  |   |
| 72 | -0.310     | 0.223   | -2.600              | 1.856   |                  |   |
| 73 | 0.029      | 0.221   | 0.250               | 1.933   |                  |   |
| 74 | 0.047      | 0.221   | 0.390               | 1.854   |                  |   |
| 75 | -0.162     | 0.222   | -1.390              | 1.895   |                  |   |
| 76 | 0.077      | 0.222   | 0.670               | 1.917   |                  |   |
| 77 | 0.296      | 0.223   | 2.460               | 1.839   |                  |   |
| 78 | 0.063      | 0.222   | 0.560               | 1.969   |                  |   |

|    | Study name | Comparison |
|----|------------|------------|
| 79 |            |            |
| 80 |            |            |
| 81 |            |            |
| 82 |            |            |
| 83 |            |            |
| 84 |            |            |
| 85 |            |            |
| 86 |            |            |
| 87 |            |            |
| 88 |            |            |
| 89 |            |            |
| 90 |            |            |
| 91 |            |            |
| 92 |            |            |
| 93 |            |            |
| 94 |            |            |
| 95 |            |            |

|    | Data format | Intervention Mean | Intervention Std-Dev | Intervention Sample size | Control Mean | Control Std-Dev | Control Sample size | Effect direction | Std diff in means | Std Err |
|----|-------------|-------------------|----------------------|--------------------------|--------------|-----------------|---------------------|------------------|-------------------|---------|
| 79 |             |                   |                      |                          |              |                 |                     |                  | 0.080             | 0.224   |
| 80 |             |                   |                      |                          |              |                 |                     |                  | -0.068            | 0.224   |
| 81 |             |                   |                      |                          |              |                 |                     |                  | 0.040             | 0.224   |
| 82 |             |                   |                      |                          |              |                 |                     |                  | 0.137             | 0.224   |
| 83 |             |                   |                      |                          |              |                 |                     |                  | 0.135             | 0.224   |
| 84 |             |                   |                      |                          |              |                 |                     |                  | -0.075            | 0.224   |
| 85 |             |                   |                      |                          |              |                 |                     |                  | -0.237            | 0.319   |
| 86 |             |                   |                      |                          |              |                 |                     |                  | 0.115             | 0.318   |
| 87 |             |                   |                      |                          |              |                 |                     |                  | 0.000             | 0.208   |
| 88 |             |                   |                      |                          |              |                 |                     |                  | 0.451             | 0.210   |
| 89 |             |                   |                      |                          |              |                 |                     |                  | -0.018            | 0.078   |
| 90 |             |                   |                      |                          |              |                 |                     |                  | 0.189             | 0.142   |
| 91 |             |                   |                      |                          |              |                 |                     |                  | 0.205             | 0.139   |
| 92 |             |                   |                      |                          |              |                 |                     |                  | -0.045            | 0.141   |
| 93 |             |                   |                      |                          |              |                 |                     |                  | 0.000             | 0.139   |
| 94 |             |                   |                      |                          |              |                 |                     |                  | 0.515             | 0.300   |
| 95 |             |                   |                      |                          |              |                 |                     |                  | 0.252             | 0.296   |



|    | Hedges's g | Std Err | Difference in means | Std Err | Duration of diet | R |
|----|------------|---------|---------------------|---------|------------------|---|
| 79 | 0.080      | 0.222   | 0.650               | 1.810   |                  |   |
| 80 | -0.067     | 0.222   | -0.620              | 2.042   |                  |   |
| 81 | 0.040      | 0.221   | 0.340               | 1.884   |                  |   |
| 82 | 0.135      | 0.222   | 1.180               | 1.930   |                  |   |
| 83 | 0.134      | 0.222   | 1.070               | 1.768   |                  |   |
| 84 | -0.074     | 0.222   | -0.660              | 1.967   |                  |   |
| 85 | -0.233     | 0.313   | -0.900              | 1.205   |                  |   |
| 86 | 0.113      | 0.312   | 0.700               | 1.936   |                  |   |
| 87 | 0.000      | 0.206   | 0.000               | 0.092   |                  |   |
| 88 | 0.448      | 0.209   | 0.200               | 0.092   |                  |   |
| 89 | -0.018     | 0.078   | -0.160              | 0.699   |                  |   |
| 90 | 0.189      | 0.141   | 0.400               | 0.299   |                  |   |
| 91 | 0.204      | 0.139   | 0.400               | 0.271   |                  |   |
| 92 | -0.045     | 0.141   | -0.100              | 0.312   |                  |   |
| 93 | 0.000      | 0.139   | 0.000               | 0.278   |                  |   |
| 94 | 0.506      | 0.295   | 1.700               | 0.973   |                  |   |
| 95 | 0.248      | 0.291   | 0.500               | 0.584   |                  |   |
