# Supplementary material for: Effect of Polyphenol Supplementation on Memory Functioning in Overweight and Obese Adults: A Systematic Review and Meta-Analysis
Source: MDPI journal article supplement (doi:10.3390/nu16040474), 2024-02-06
Supplement: s1 [file s1]

|    | Study name | Comparison |
|----|------------|------------|
| 1  |            |            |
| 2  |            |            |
| 3  |            |            |
| 4  |            |            |
| 5  |            |            |
| 6  |            |            |
| 7  |            |            |
| 8  |            |            |
| 9  |            |            |
| 10 |            |            |
| 11 |            |            |
| 12 |            |            |
| 13 |            |            |
| 14 |            |            |
| 15 |            |            |
| 16 |            |            |
| 17 |            |            |
| 18 |            |            |
| 19 |            |            |
| 20 |            |            |
| 21 |            |            |
| 22 |            |            |
| 23 |            |            |
| 24 |            |            |
| 25 |            |            |
| 26 |            |            |
| 27 |            |            |
| 28 |            |            |
| 29 |            |            |
| 30 |            |            |
| 31 |            |            |
| 32 |            |            |
| 33 |            |            |
| 34 |            |            |
| 35 |            |            |
| 36 |            |            |
| 37 |            |            |
| 38 |            |            |
| 39 |            |            |

|    | Data format | Intervention Mean | Intervention Std-Dev | Intervention Sample size | Control Mean | Control Std-Dev | Control Sample size | Effect direction | Std diff in means | Std Err |
|----|-------------|-------------------|----------------------|--------------------------|--------------|-----------------|---------------------|------------------|-------------------|---------|
| 1  |             |                   |                      |                          |              |                 |                     |                  | 0.000             | 0.302   |
| 2  |             |                   |                      |                          |              |                 |                     |                  | 0.094             | 0.302   |
| 3  |             |                   |                      |                          |              |                 |                     |                  | -0.221            | 0.449   |
| 4  |             |                   |                      |                          |              |                 |                     |                  | -0.832            | 0.446   |
| 5  |             |                   |                      |                          |              |                 |                     |                  | 1.342             | 0.553   |
| 6  |             |                   |                      |                          |              |                 |                     |                  | 0.199             | 0.501   |
| 7  |             |                   |                      |                          |              |                 |                     |                  | 0.000             | 0.500   |
| 8  |             |                   |                      |                          |              |                 |                     |                  | 0.137             | 0.394   |
| 9  |             |                   |                      |                          |              |                 |                     |                  | -0.286            | 0.395   |
| 10 |             |                   |                      |                          |              |                 |                     |                  | -0.599            | 0.386   |
| 11 |             |                   |                      |                          |              |                 |                     |                  | -0.110            | 0.378   |
| 12 |             |                   |                      |                          |              |                 |                     |                  | -0.125            | 0.378   |
| 13 |             |                   |                      |                          |              |                 |                     |                  | -0.301            | 0.335   |
| 14 |             |                   |                      |                          |              |                 |                     |                  | 0.092             | 0.334   |
| 15 |             |                   |                      |                          |              |                 |                     |                  | 0.590             | 0.341   |
| 16 |             |                   |                      |                          |              |                 |                     |                  | 0.198             | 0.334   |
| 17 |             |                   |                      |                          |              |                 |                     |                  | -0.291            | 0.335   |
| 18 |             |                   |                      |                          |              |                 |                     |                  | -0.465            | 0.338   |
| 19 |             |                   |                      |                          |              |                 |                     |                  | -0.015            | 0.333   |
| 20 |             |                   |                      |                          |              |                 |                     |                  | 0.013             | 0.333   |
| 21 |             |                   |                      |                          |              |                 |                     |                  | -0.392            | 0.280   |
| 22 |             |                   |                      |                          |              |                 |                     |                  | -0.194            | 0.275   |
| 23 |             |                   |                      |                          |              |                 |                     |                  | 0.000             | 0.278   |
| 24 |             |                   |                      |                          |              |                 |                     |                  | -0.065            | 0.275   |
| 25 |             |                   |                      |                          |              |                 |                     |                  | -0.118            | 0.278   |
| 26 |             |                   |                      |                          |              |                 |                     |                  | 0.117             | 0.275   |
| 27 |             |                   |                      |                          |              |                 |                     |                  | -0.110            | 0.278   |
| 28 |             |                   |                      |                          |              |                 |                     |                  | 0.016             | 0.275   |
| 29 |             |                   |                      |                          |              |                 |                     |                  | -0.078            | 0.113   |
| 30 |             |                   |                      |                          |              |                 |                     |                  | 0.156             | 0.113   |
| 31 |             |                   |                      |                          |              |                 |                     |                  | 0.256             | 0.114   |
| 32 |             |                   |                      |                          |              |                 |                     |                  | 0.261             | 0.152   |
| 33 |             |                   |                      |                          |              |                 |                     |                  | 0.087             | 0.151   |
| 34 |             |                   |                      |                          |              |                 |                     |                  | 0.261             | 0.152   |
| 35 |             |                   |                      |                          |              |                 |                     |                  | -0.074            | 0.218   |
| 36 |             |                   |                      |                          |              |                 |                     |                  | 0.134             | 0.218   |
| 37 |             |                   |                      |                          |              |                 |                     |                  | 0.029             | 0.218   |
| 38 |             |                   |                      |                          |              |                 |                     |                  | 0.363             | 0.220   |
| 39 |             |                   |                      |                          |              |                 |                     |                  | -0.282            | 0.219   |

|    | Hedges's g | Std Err | Difference in means | Std Err | Duration of Diet | K |
|----|------------|---------|---------------------|---------|------------------|---|
| 1  | 0.000      | 0.296   | 0.000               | 0.583   |                  |   |
| 2  | 0.092      | 0.296   | 0.200               | 0.640   |                  |   |
| 3  | -0.211     | 0.430   | -0.630              | 1.277   |                  |   |
| 4  | -0.800     | 0.429   | -2.070              | 1.066   |                  |   |
| 5  | 1.268      | 0.523   | 0.030               | 0.011   |                  |   |
| 6  | 0.188      | 0.474   | 0.020               | 0.050   |                  |   |
| 7  | 0.000      | 0.473   | 0.000               | 0.043   |                  |   |
| 8  | 0.133      | 0.381   | 0.015               | 0.043   |                  |   |
| 9  | -0.277     | 0.383   | -0.052              | 0.071   |                  |   |
| 10 | -0.582     | 0.375   | -10.000             | 6.308   |                  |   |
| 11 | -0.107     | 0.367   | -1.000              | 3.423   |                  |   |
| 12 | -0.121     | 0.367   | -1.000              | 3.024   |                  |   |
| 13 | -0.294     | 0.328   | -0.600              | 0.665   |                  |   |
| 14 | 0.090      | 0.326   | 0.180               | 0.651   |                  |   |
| 15 | 0.577      | 0.333   | 1.290               | 0.728   |                  |   |
| 16 | 0.194      | 0.327   | 0.500               | 0.842   |                  |   |
| 17 | -0.284     | 0.328   | -0.530              | 0.608   |                  |   |
| 18 | -0.455     | 0.330   | -0.750              | 0.537   |                  |   |
| 19 | -0.015     | 0.326   | -0.290              | 6.350   |                  |   |
| 20 | 0.013      | 0.326   | 0.250               | 6.251   |                  |   |
| 21 | -0.386     | 0.276   | -0.800              | 0.567   |                  |   |
| 22 | -0.191     | 0.271   | -0.400              | 0.566   |                  |   |
| 23 | 0.000      | 0.273   | 0.000               | 0.425   |                  |   |
| 24 | -0.064     | 0.271   | -0.100              | 0.424   |                  |   |
| 25 | -0.116     | 0.274   | -0.300              | 0.708   |                  |   |
| 26 | 0.115      | 0.271   | 0.300               | 0.707   |                  |   |
| 27 | -0.108     | 0.274   | -1.400              | 3.541   |                  |   |
| 28 | 0.015      | 0.271   | 0.200               | 3.537   |                  |   |
| 29 | -0.078     | 0.113   |                     |         |                  |   |
| 30 | 0.155      | 0.113   |                     |         |                  |   |
| 31 | 0.256      | 0.113   |                     |         |                  |   |
| 32 | 0.259      | 0.151   | 0.300               | 0.174   |                  |   |
| 33 | 0.086      | 0.151   | 0.100               | 0.174   |                  |   |
| 34 | 0.260      | 0.151   | 2.600               | 1.507   |                  |   |
| 35 | -0.074     | 0.216   | -0.630              | 1.846   |                  |   |
| 36 | 0.133      | 0.216   | 1.150               | 1.874   |                  |   |
| 37 | 0.029      | 0.216   | 0.240               | 1.819   |                  |   |
| 38 | 0.359      | 0.218   | 3.150               | 1.895   |                  |   |
| 39 | -0.280     | 0.217   | -2.400              | 1.855   |                  |   |

|    | Study name | Comparison |
|----|------------|------------|
| 40 |            |            |
| 41 |            |            |
| 42 |            |            |
| 43 |            |            |
| 44 |            |            |
| 45 |            |            |
| 46 |            |            |
| 47 |            |            |
| 48 |            |            |
| 49 |            |            |
| 50 |            |            |
| 51 |            |            |
| 52 |            |            |
| 53 |            |            |
| 54 |            |            |
| 55 |            |            |
| 56 |            |            |
| 57 |            |            |
| 58 |            |            |
| 59 |            |            |
| 60 |            |            |
| 61 |            |            |
| 62 |            |            |
| 63 |            |            |
| 64 |            |            |
| 65 |            |            |
| 66 |            |            |
| 67 |            |            |
| 68 |            |            |
| 69 |            |            |
| 70 |            |            |
| 71 |            |            |
| 72 |            |            |
| 73 |            |            |
| 74 |            |            |
| 75 |            |            |
| 76 |            |            |
| 77 |            |            |
| 78 |            |            |

|    | Data format | Intervention Mean | Intervention Std-Dev | Intervention Sample size | Control Mean | Control Std-Dev | Control Sample size | Effect direction | Std diff in means | Std Err |
|----|-------------|-------------------|----------------------|--------------------------|--------------|-----------------|---------------------|------------------|-------------------|---------|
| 40 |             |                   |                      |                          |              |                 |                     |                  | 0.243             | 0.219   |
| 41 |             |                   |                      |                          |              |                 |                     |                  | -0.108            | 0.218   |
| 42 |             |                   |                      |                          |              |                 |                     |                  | 0.009             | 0.218   |
| 43 |             |                   |                      |                          |              |                 |                     |                  | -0.440            | 0.221   |
| 44 |             |                   |                      |                          |              |                 |                     |                  | -0.021            | 0.218   |
| 45 |             |                   |                      |                          |              |                 |                     |                  | 0.070             | 0.218   |
| 46 |             |                   |                      |                          |              |                 |                     |                  | -0.103            | 0.218   |
| 47 |             |                   |                      |                          |              |                 |                     |                  | 0.196             | 0.219   |
| 48 |             |                   |                      |                          |              |                 |                     |                  | 0.170             | 0.219   |
| 49 |             |                   |                      |                          |              |                 |                     |                  | -0.040            | 0.218   |
| 50 |             |                   |                      |                          |              |                 |                     |                  | 0.431             | 0.221   |
| 51 |             |                   |                      |                          |              |                 |                     |                  | 0.158             | 0.230   |
| 52 |             |                   |                      |                          |              |                 |                     |                  | 0.128             | 0.230   |
| 53 |             |                   |                      |                          |              |                 |                     |                  | 0.082             | 0.230   |
| 54 |             |                   |                      |                          |              |                 |                     |                  | 0.180             | 0.230   |
| 55 |             |                   |                      |                          |              |                 |                     |                  | -0.036            | 0.229   |
| 56 |             |                   |                      |                          |              |                 |                     |                  | 0.067             | 0.229   |
| 57 |             |                   |                      |                          |              |                 |                     |                  | 0.168             | 0.230   |
| 58 |             |                   |                      |                          |              |                 |                     |                  | -0.052            | 0.229   |
| 59 |             |                   |                      |                          |              |                 |                     |                  | 0.288             | 0.231   |
| 60 |             |                   |                      |                          |              |                 |                     |                  | -0.020            | 0.229   |
| 61 |             |                   |                      |                          |              |                 |                     |                  | -0.028            | 0.229   |
| 62 |             |                   |                      |                          |              |                 |                     |                  | -0.216            | 0.230   |
| 63 |             |                   |                      |                          |              |                 |                     |                  | -0.030            | 0.229   |
| 64 |             |                   |                      |                          |              |                 |                     |                  | -0.050            | 0.229   |
| 65 |             |                   |                      |                          |              |                 |                     |                  | 0.069             | 0.229   |
| 66 |             |                   |                      |                          |              |                 |                     |                  | 0.222             | 0.230   |
| 67 |             |                   |                      |                          |              |                 |                     |                  | 0.154             | 0.219   |
| 68 |             |                   |                      |                          |              |                 |                     |                  | 0.360             | 0.220   |
| 69 |             |                   |                      |                          |              |                 |                     |                  | 0.107             | 0.218   |
| 70 |             |                   |                      |                          |              |                 |                     |                  | 0.053             | 0.218   |
| 71 |             |                   |                      |                          |              |                 |                     |                  | -0.028            | 0.218   |
| 72 |             |                   |                      |                          |              |                 |                     |                  | 0.021             | 0.218   |
| 73 |             |                   |                      |                          |              |                 |                     |                  | 0.136             | 0.218   |
| 74 |             |                   |                      |                          |              |                 |                     |                  | 0.124             | 0.218   |
| 75 |             |                   |                      |                          |              |                 |                     |                  | 0.073             | 0.218   |
| 76 |             |                   |                      |                          |              |                 |                     |                  | -0.064            | 0.218   |
| 77 |             |                   |                      |                          |              |                 |                     |                  | 0.261             | 0.219   |
| 78 |             |                   |                      |                          |              |                 |                     |                  | 0.086             | 0.218   |

|    | Hedges's g | Std Err | Difference<br>in means | Std Err | Duration of<br>Diet | K |
|----|------------|---------|------------------------|---------|---------------------|---|
| 40 | 0.240      | 0.217   | 2.130                  | 1.916   |                     |   |
| 41 | -0.107     | 0.216   | -0.910                 | 1.842   |                     |   |
| 42 | 0.008      | 0.216   | 0.070                  | 1.794   |                     |   |
| 43 | -0.436     | 0.219   | -3.380                 | 1.677   |                     |   |
| 44 | -0.021     | 0.216   | -0.170                 | 1.791   |                     |   |
| 45 | 0.069      | 0.216   | 0.560                  | 1.747   |                     |   |
| 46 | -0.102     | 0.216   | -0.830                 | 1.761   |                     |   |
| 47 | 0.194      | 0.217   | 1.760                  | 1.961   |                     |   |
| 48 | 0.168      | 0.217   | 1.330                  | 1.711   |                     |   |
| 49 | -0.040     | 0.216   | -0.370                 | 2.002   |                     |   |
| 50 | 0.427      | 0.219   | 3.420                  | 1.732   |                     |   |
| 51 | 0.156      | 0.227   | 1.890                  | 2.748   |                     |   |
| 52 | 0.127      | 0.227   | 1.490                  | 2.662   |                     |   |
| 53 | 0.081      | 0.227   | 1.080                  | 3.010   |                     |   |
| 54 | 0.178      | 0.228   | 2.120                  | 2.707   |                     |   |
| 55 | -0.036     | 0.227   | -0.470                 | 3.003   |                     |   |
| 56 | 0.066      | 0.227   | 0.890                  | 3.044   |                     |   |
| 57 | 0.166      | 0.227   | 1.870                  | 2.555   |                     |   |
| 58 | -0.051     | 0.227   | -0.680                 | 3.010   |                     |   |
| 59 | 0.285      | 0.228   | 3.290                  | 2.622   |                     |   |
| 60 | -0.020     | 0.227   | -0.240                 | 2.741   |                     |   |
| 61 | -0.028     | 0.227   | -0.330                 | 2.701   |                     |   |
| 62 | -0.214     | 0.228   | -2.620                 | 2.781   |                     |   |
| 63 | -0.030     | 0.227   | -0.350                 | 2.673   |                     |   |
| 64 | -0.049     | 0.227   | -0.590                 | 2.709   |                     |   |
| 65 | 0.068      | 0.227   | 0.810                  | 2.701   |                     |   |
| 66 | 0.220      | 0.228   | 2.680                  | 2.767   |                     |   |
| 67 | 0.153      | 0.217   | 0.470                  | 0.665   |                     |   |
| 68 | 0.357      | 0.218   | 1.160                  | 0.703   |                     |   |
| 69 | 0.106      | 0.216   | 0.320                  | 0.652   |                     |   |
| 70 | 0.053      | 0.216   | 0.170                  | 0.697   |                     |   |
| 71 | -0.028     | 0.216   | -0.090                 | 0.697   |                     |   |
| 72 | 0.021      | 0.216   | 0.070                  | 0.715   |                     |   |
| 73 | 0.135      | 0.216   | 0.420                  | 0.672   |                     |   |
| 74 | 0.123      | 0.216   | 0.370                  | 0.651   |                     |   |
| 75 | 0.073      | 0.216   | 0.240                  | 0.714   |                     |   |
| 76 | -0.064     | 0.216   | -0.210                 | 0.715   |                     |   |
| 77 | 0.258      | 0.217   | 0.760                  | 0.636   |                     |   |
| 78 | 0.086      | 0.216   | 0.280                  | 0.708   |                     |   |

|    | Study name | Comparison |
|----|------------|------------|
| 79 |            |            |
| 80 |            |            |
| 81 |            |            |
| 82 |            |            |
| 83 |            |            |
| 84 |            |            |
| 85 |            |            |
| 86 |            |            |
| 87 |            |            |
| 88 |            |            |
| 89 |            |            |
| 90 |            |            |
| 91 |            |            |
| 92 |            |            |
| 93 |            |            |
| 94 |            |            |
| 95 |            |            |
| 96 |            |            |

|    | Data format | Intervention Mean | Intervention Std-Dev | Intervention Sample size | Control Mean | Control Std-Dev | Control Sample size | Effect direction | Std diff in means | Std Err |
|----|-------------|-------------------|----------------------|--------------------------|--------------|-----------------|---------------------|------------------|-------------------|---------|
| 79 |             |                   |                      |                          |              |                 |                     |                  | 0.415             | 0.221   |
| 80 |             |                   |                      |                          |              |                 |                     |                  | 0.006             | 0.218   |
| 81 |             |                   |                      |                          |              |                 |                     |                  | -0.072            | 0.218   |
| 82 |             |                   |                      |                          |              |                 |                     |                  | -0.107            | 0.218   |
| 83 |             |                   |                      |                          |              |                 |                     |                  | 0.000             | 0.208   |
| 84 |             |                   |                      |                          |              |                 |                     |                  | 2.035             | 0.254   |
| 85 |             |                   |                      |                          |              |                 |                     |                  | -0.031            | 0.193   |
| 86 |             |                   |                      |                          |              |                 |                     |                  | 0.296             | 0.194   |
| 87 |             |                   |                      |                          |              |                 |                     |                  | -0.105            | 0.193   |
| 88 |             |                   |                      |                          |              |                 |                     |                  | 0.077             | 0.193   |
| 89 |             |                   |                      |                          |              |                 |                     |                  | -0.079            | 0.078   |
| 90 |             |                   |                      |                          |              |                 |                     |                  | -0.034            | 0.078   |
| 91 |             |                   |                      |                          |              |                 |                     |                  | 0.017             | 0.078   |
| 92 |             |                   |                      |                          |              |                 |                     |                  | 0.026             | 0.078   |
| 93 |             |                   |                      |                          |              |                 |                     |                  | 0.018             | 0.141   |
| 94 |             |                   |                      |                          |              |                 |                     |                  | 0.189             | 0.139   |
| 95 |             |                   |                      |                          |              |                 |                     |                  | -0.007            | 0.141   |
| 96 |             |                   |                      |                          |              |                 |                     |                  | 0.021             | 0.139   |



|    | Hedges's g | Std Err | Difference<br>in means | Std Err | Duration of<br>Diet | K |
|----|------------|---------|------------------------|---------|---------------------|---|
| 79 | 0.411      | 0.219   | 1.210                  | 0.636   |                     |   |
| 80 | 0.006      | 0.216   | 0.020                  | 0.707   |                     |   |
| 81 | -0.071     | 0.216   | -0.200                 | 0.609   |                     |   |
| 82 | -0.106     | 0.216   | -0.360                 | 0.737   |                     |   |
| 83 | 0.000      | 0.206   | 0.000                  | 0.071   |                     |   |
| 84 | 2.019      | 0.252   | 0.700                  | 0.071   |                     |   |
| 85 | -0.031     | 0.192   | -0.010                 | 0.063   |                     |   |
| 86 | 0.294      | 0.193   | 0.195                  | 0.127   |                     |   |
| 87 | -0.104     | 0.192   | -0.091                 | 0.167   |                     |   |
| 88 | 0.077      | 0.192   | 0.061                  | 0.152   |                     |   |
| 89 | -0.079     | 0.078   | -0.050                 | 0.049   |                     |   |
| 90 | -0.034     | 0.078   | -0.370                 | 0.849   |                     |   |
| 91 | 0.017      | 0.078   | 0.340                  | 1.583   |                     |   |
| 92 | 0.026      | 0.078   | 0.740                  | 2.256   |                     |   |
| 93 | 0.018      | 0.141   | 0.100                  | 0.783   |                     |   |
| 94 | 0.188      | 0.139   | 1.000                  | 0.737   |                     |   |
| 95 | -0.007     | 0.141   | -0.100                 | 2.030   |                     |   |
| 96 | 0.021      | 0.139   | 0.300                  | 2.016   |                     |   |
