# Supplementary material for: Effect of Polyphenol Supplementation on Memory Functioning in Overweight and Obese Adults: A Systematic Review and Meta-Analysis
Source: MDPI journal article supplement (doi:10.3390/nu16040474), 2024-02-06
Supplement: s1 [file s1]

**Table S1.** Sensitivity analysis of the studies (RCTs and Cross-over design) included for immediate recall meta-analysis.

| RCT                          | Model statistics with this study omitted |          |          |
|------------------------------|------------------------------------------|----------|----------|
| Study omitted                | <i>Hedges g</i>                          | <i>z</i> | <i>p</i> |
| Anton et al 2018             | 0.255                                    | 2.50     | 0.012    |
| Boespflug et al 2017         | 0.217                                    | 2.05     | 0.040    |
| Botwell et al 2017           | 0.243                                    | 2.27     | 0.023    |
| Fournier et al 2007          | 0.253                                    | 2.33     | 0.019    |
| Henderson et al 2012         | 0.249                                    | 2.05     | 0.040    |
| Kreijkamp-Kaspers et al 2004 | 0.234                                    | 1.99     | 0.046    |
| Rayney-Smith et al 2015      | 0.132                                    | 1.74     | 0.082    |
| Sala-Vila et al 2020         | 0.257                                    | 2.23     | 0.025    |
| Siddarth et al 2020          | 0.254                                    | 2.17     | 0.030    |
| Evans et al. 2017            | 0.239                                    | 2.12     | 0.034    |
| You et al. 2021              | 0.182                                    | 1.95     | 0.051    |
| Herrlinger et al., 2018      | 0.201                                    | 1.8      | 0.061    |
| Cross-over                   | Model statistics with this study omitted |          |          |
| Alharbi et al. 2016          | -2.385                                   | -0.145   | 0.884    |
| Cook et al 2020              | 3.907                                    | 0.251    | 0.802    |
| Dodd et al 2019              | -0.004                                   | -2.523   | 0.980    |
| Kennedy et al 2017           | -0.058                                   | -0.311   | 0.755    |
