# Supplementary material for: Effect of Polyphenol Supplementation on Memory Functioning in Overweight and Obese Adults: A Systematic Review and Meta-Analysis
Source: Nutrients. 2024 Feb 6;16(4):474. doi: 10.3390/nu16040474 (PMC10893550; doi:10.3390/nu16040474)
Supplement: Supplementary file 1 [file nutrients-16-00474-s001.zip]

Archive with 8 entries (8 files):
- S1 Table.pdf
- S2 Figure Sub-group meta-analysis for isoflavone.jpg
- S3 Figure Sub-group meta-analysis for Resveratrol.jpg
- S4 Table Sensitivity analysis for immediate recall.pdf
- S5 Figure Funnel plot for delayed retrival.jpg
- S6 Table Sensitivity analysis for Delayed recall.pdf
- S7 Raw data for immediate recall metaanalysis.pdf
- S8 Raw data for delayed recall metaanalysis.pdf
